# Supplementary material
Source: publisher figshare collection journal article supplement (https://karger.figshare.com/ndownloader/files/40857812)
Supplement: Supplementary file 1 [file 40857812]

| **Supplementary Table 3 Comparisons of basic characteristics among male and female groups.** | | | | |
| --- | --- | --- | --- | --- |
|  | **Male** | | **Female** | ***P* value** |
| **Demographics and Anthropometrics** | |  |  |  |
| Patients (n) | 368 | | 649 |  |
| Age (years) | 35.03±0.49 | | 32.75±0.52 | <0.0001 |
| BMI (kg/m2) | 34.09±0.42 | | 29.64±0.33 | <0.0001 |
| BAI | 39.56±0.37 | | 33.31±0.66 | 0.0001 |
| Waist circumference (cm) | 125.0±1.43 | | 112.4±0.81 | <0.0001 |
| Hip circumference (cm) | 129.6±1.60 | | 122.7±0.78 | <0.0001 |
| WHR | 0.96±0.02 | | 0.91±0.01 | <0.0001 |
| T2DM (n, %) | 144 (39.1%) | | 216 (33.2%) | 0.0320 |
| **Metabolic Parameters** |  | |  |  |
| HbA1c (%) | 6.88±0.26 | | 6.27±0.08 | 0.0087 |
| Fasting glucose(mmol/L) | 6.25±0.09 | | 6.45±0.13 | 0.1604 |
| Fasting Insulin(μU/ml) | 24.81±0.84 | | 20.67±0.74 | 0.0003 |
| Fasting FFA(mmol/L) | 0.70±0.02 | | 0.69±0.02 | 0.9624 |
| Triglyceride(mmol/l) | 2.15±0.12 | | 1.87±0.07 | 0.0791 |
| TC (mmol/l) | 4.99±0.04 | | 4.91±0.04 | 0.1794 |
| LDL-C (mmol/l) | 2.97±0.03 | | 3.04±0.03 | 0.1430 |
| HDL-C (mmol/l) | 1.14±0.02 | | 1.19±0.01 | 0.1035 |
| Uric acid(μmol/L) | 409.6±3.93 | | 354.6±6.39 | <0.0001 |
| Adipo-IR | 137.5±6.02 | | 124.8±6.78 | 0.0961 |
| HOMA-IR | 7.66±0.32 | | 5.88±0.26 | <0.0001 |
| HOMA-β | 245.8±11.31 | | 178.9±7.68 | <0.0001 |
| GH (ng/ml) | 0.23±0.02 | | 0.42±0.18 | 0.3065 |
| **Liver function parameters** |  | |  |  |
| ALT (IU/L) | 44.25±2.43 | | 39.54±1.28 | 0.0635 |
| AST (IU/L) | 24.89±0.52 | | 28.77±1.35 | 0.0024 |
| **Inflammatory biomarker** |  | |  |  |
| hsCRP(mg/L) | 6.48±0.33 | | 4.44±0.40 | <0.0001 |

Data are expressed as mean ± SEM. Statistical significance was defined as *P* < 0.05.

Abbreviations: GH, growth hormone; BMI, body mass index; BAI, body adiposity index; WHR, waist-to-hip ratio; T2DM, type 2 diabetes mellitus; GLP-1RA, glucagon-like peptide 1 receptor agonist; HbA1c, glycosylated hemoglobin; FFA, free fatty acid; TC, Total cholesterol; LDL-C, low-density lipoprotein cholesterol; HDL-C, high-density lipoprotein cholesterol; Adipo-IR, adipose tissue insulin resistance; HOMA-IR, homeostasis model assessment of insulin resistance index; HOMA-β, homeostasis model assessment of β-cell function; GH, growth hormone; GH, growth hormone; ALT, alanine aminotransferase; AST, aspartate aminotransferase; hsCRP, high sensitivity C reactive protein.
